# Supplementary material
Source: ML conference proceedings conference paper supplement (https://openaccess.thecvf.com/content/CVPR2022/html/Ye_Hierarchical_Modular_Network_CVPR_2022_paper.html)
Supplement: Supplementary file 1 [file Ye_Hierarchical_Modular_Network_CVPR_2022_supplemental.pdf]

# Supplementary for Hierarchical Modular Network for Video Captioning

|                                                                                                                                                                                                                                                                                                                                                      |           |            |            |            |            |
|------------------------------------------------------------------------------------------------------------------------------------------------------------------------------------------------------------------------------------------------------------------------------------------------------------------------------------------------------|-----------|------------|------------|------------|------------|
|                  |           |            |            |            |            |
| Object#0                                                                                                                                                                                                                                                                                                                                             | woman     | lady       | female     | feminie    | wife       |
|                                                                                                                                                                                                                                                                                                                                                      | 0.992     | 0.889      | 0.861      | 0.704      | 0.682      |
| Object#1                                                                                                                                                                                                                                                                                                                                             | girl      | daughter   | female     | schoolgirl | girlfriend |
|                                                                                                                                                                                                                                                                                                                                                      | 0.945     | 0.792      | 0.718      | 0.704      | 0.680      |
| Object#2                                                                                                                                                                                                                                                                                                                                             | person    | human      | someone    | somebody   | personnel  |
|                                                                                                                                                                                                                                                                                                                                                      | 0.930     | 0.835      | 0.792      | 0.732      | 0.721      |
| Object#3                                                                                                                                                                                                                                                                                                                                             | stroller  | baby       | pram       | infant     | cradle     |
|                                                                                                                                                                                                                                                                                                                                                      | 0.899     | 0.696      | 0.691      | 0.660      | 0.608      |
| Object#4                                                                                                                                                                                                                                                                                                                                             | stroller  | pram       | baby       | infant     | toddler    |
|                                                                                                                                                                                                                                                                                                                                                      | 0.899     | 0.701      | 0.666      | 0.630      | 0.589      |
| Object#5                                                                                                                                                                                                                                                                                                                                             | stroller  | baby       | infant     | pram       | toddler    |
|                                                                                                                                                                                                                                                                                                                                                      | 0.886     | 0.772      | 0.688      | 0.717      | 0.709      |
| Object#6                                                                                                                                                                                                                                                                                                                                             | child     | kid        | baby       | youngster  | infant     |
|                                                                                                                                                                                                                                                                                                                                                      | 0.821     | 0.773      | 0.737      | 0.717      | 0.709      |
| Object#7                                                                                                                                                                                                                                                                                                                                             | cradle    | item       | gear       | stuff      | outfit     |
|                                                                                                                                                                                                                                                                                                                                                      | 0.638     | 0.614      | 0.608      | 0.606      | 0.598      |
| Ground truth: a <b>woman</b> is talking about a baby <b>stroller</b><br>Ours: a <b>woman</b> is demonstrating a <b>stroller</b>                                                                                                                                                                                                                      |           |            |            |            |            |
| (a)                                                                                                                                                                                                                                                                                                                                                  |           |            |            |            |            |
|             |           |            |            |            |            |
| Object#0                                                                                                                                                                                                                                                                                                                                             | woman     | lady       | female     | feminie    | wife       |
|                                                                                                                                                                                                                                                                                                                                                      | 0.995     | 0.901      | 0.864      | 0.710      | 0.686      |
| Object#1                                                                                                                                                                                                                                                                                                                                             | girl      | female     | woman      | lady       | girlfriend |
|                                                                                                                                                                                                                                                                                                                                                      | 0.926     | 0.810      | 0.778      | 0.756      | 0.752      |
| Object#2                                                                                                                                                                                                                                                                                                                                             | person    | human      | someone    | somebody   | personnel  |
|                                                                                                                                                                                                                                                                                                                                                      | 0.878     | 0.775      | 0.751      | 0.718      | 0.683      |
| Object#3                                                                                                                                                                                                                                                                                                                                             | cooking   | food       | dish       | dishware   | cook       |
|                                                                                                                                                                                                                                                                                                                                                      | 0.786     | 0.762      | 0.760      | 0.731      | 0.729      |
| Object#4                                                                                                                                                                                                                                                                                                                                             | cooking   | dish       | food       | dishware   | cookware   |
|                                                                                                                                                                                                                                                                                                                                                      | 0.782     | 0.758      | 0.752      | 0.733      | 0.727      |
| Object#5                                                                                                                                                                                                                                                                                                                                             | cooking   | dish       | food       | dishware   | cookware   |
|                                                                                                                                                                                                                                                                                                                                                      | 0.782     | 0.758      | 0.752      | 0.733      | 0.727      |
| Object#6                                                                                                                                                                                                                                                                                                                                             | kitchen   | pot        | dish       | bowl       | cookware   |
|                                                                                                                                                                                                                                                                                                                                                      | 0.657     | 0.638      | 0.636      | 0.635      | 0.627      |
| Object#7                                                                                                                                                                                                                                                                                                                                             | container | pot        | bowl       | dish       | item       |
|                                                                                                                                                                                                                                                                                                                                                      | 0.653     | 0.652      | 0.645      | 0.626      | 0.625      |
| Ground truth: a <b>woman</b> is explaining how to prepare a <b>dish</b><br>Ours: a <b>woman</b> in a <b>kitchen</b> is talking about how to prepare a <b>dish</b>                                                                                                                                                                                    |           |            |            |            |            |
| (b)                                                                                                                                                                                                                                                                                                                                                  |           |            |            |            |            |
|          |           |            |            |            |            |
| Object#0                                                                                                                                                                                                                                                                                                                                             | woman     | lady       | female     | feminie    | wife       |
|                                                                                                                                                                                                                                                                                                                                                      | 0.993     | 0.892      | 0.868      | 0.710      | 0.681      |
| Object#1                                                                                                                                                                                                                                                                                                                                             | man       | male       | gentleman  | men        | guy        |
|                                                                                                                                                                                                                                                                                                                                                      | 0.992     | 0.776      | 0.758      | 0.715      | 0.663      |
| Object#2                                                                                                                                                                                                                                                                                                                                             | girl      | daughter   | female     | schoolgirl | girlfriend |
|                                                                                                                                                                                                                                                                                                                                                      | 0.945     | 0.758      | 0.744      | 0.728      | 0.707      |
| Object#3                                                                                                                                                                                                                                                                                                                                             | food      | meal       | cuisine    | snack      | dish       |
|                                                                                                                                                                                                                                                                                                                                                      | 0.925     | 0.835      | 0.783      | 0.699      | 0.692      |
| Object#4                                                                                                                                                                                                                                                                                                                                             | food      | meal       | cuisine    | snack      | lunch      |
|                                                                                                                                                                                                                                                                                                                                                      | 0.918     | 0.816      | 0.767      | 0.675      | 0.666      |
| Object#5                                                                                                                                                                                                                                                                                                                                             | person    | human      | someone    | somebody   | people     |
|                                                                                                                                                                                                                                                                                                                                                      | 0.880     | 0.818      | 0.754      | 0.723      | 0.707      |
| Object#6                                                                                                                                                                                                                                                                                                                                             | food      | meal       | cuisine    | snack      | lunch      |
|                                                                                                                                                                                                                                                                                                                                                      | 0.867     | 0.767      | 0.736      | 0.671      | 0.667      |
| Object#7                                                                                                                                                                                                                                                                                                                                             | item      | food       | stuff      | meal       | dish       |
|                                                                                                                                                                                                                                                                                                                                                      | 0.630     | 0.623      | 0.622      | 0.613      | 0.602      |
| Ground truth: a <b>man</b> and <b>women</b> tasting <b>food</b><br>Ours: a <b>man</b> and a <b>woman</b> are eating <b>food</b>                                                                                                                                                                                                                      |           |            |            |            |            |
| (c)                                                                                                                                                                                                                                                                                                                                                  |           |            |            |            |            |
|     |           |            |            |            |            |
| Object#0                                                                                                                                                                                                                                                                                                                                             | man       | male       | gentleman  | men        | guy        |
|                                                                                                                                                                                                                                                                                                                                                      | 0.992     | 0.765      | 0.752      | 0.690      | 0.659      |
| Object#1                                                                                                                                                                                                                                                                                                                                             | person    | human      | someone    | somebody   | personnel  |
|                                                                                                                                                                                                                                                                                                                                                      | 0.965     | 0.844      | 0.818      | 0.760      | 0.739      |
| Object#2                                                                                                                                                                                                                                                                                                                                             | car       | automobile | vehicle    | sedan      | suv        |
|                                                                                                                                                                                                                                                                                                                                                      | 0.929     | 0.854      | 0.835      | 0.767      | 0.682      |
| Object#3                                                                                                                                                                                                                                                                                                                                             | car       | automobile | vehicle    | sedan      | coupe      |
|                                                                                                                                                                                                                                                                                                                                                      | 0.904     | 0.833      | 0.823      | 0.749      | 0.686      |
| Object#4                                                                                                                                                                                                                                                                                                                                             | car       | vehicle    | automobile | sedan      | coupe      |
|                                                                                                                                                                                                                                                                                                                                                      | 0.879     | 0.813      | 0.811      | 0.729      | 0.695      |
| Object#5                                                                                                                                                                                                                                                                                                                                             | car       | vehicle    | automobile | coupe      | sedan      |
|                                                                                                                                                                                                                                                                                                                                                      | 0.788     | 0.764      | 0.736      | 0.690      | 0.672      |
| Object#6                                                                                                                                                                                                                                                                                                                                             | person    | woman      | lady       | human      | female     |
|                                                                                                                                                                                                                                                                                                                                                      | 0.764     | 0.760      | 0.749      | 0.721      | 0.694      |
| Object#7                                                                                                                                                                                                                                                                                                                                             | gear      | equipment  | vehicle    | apparatus  | coupe      |
|                                                                                                                                                                                                                                                                                                                                                      | 0.690     | 0.676      | 0.675      | 0.666      | 0.652      |
| Ground truth: a <b>person</b> is fixing a <b>car</b><br>Ours: a <b>man</b> is fixing a <b>car</b>                                                                                                                                                                                                                                                    |           |            |            |            |            |
| (d)                                                                                                                                                                                                                                                                                                                                                  |           |            |            |            |            |

Figure 1. Illustration of principal objects predicted by the entity module. See Section 1 for more details.

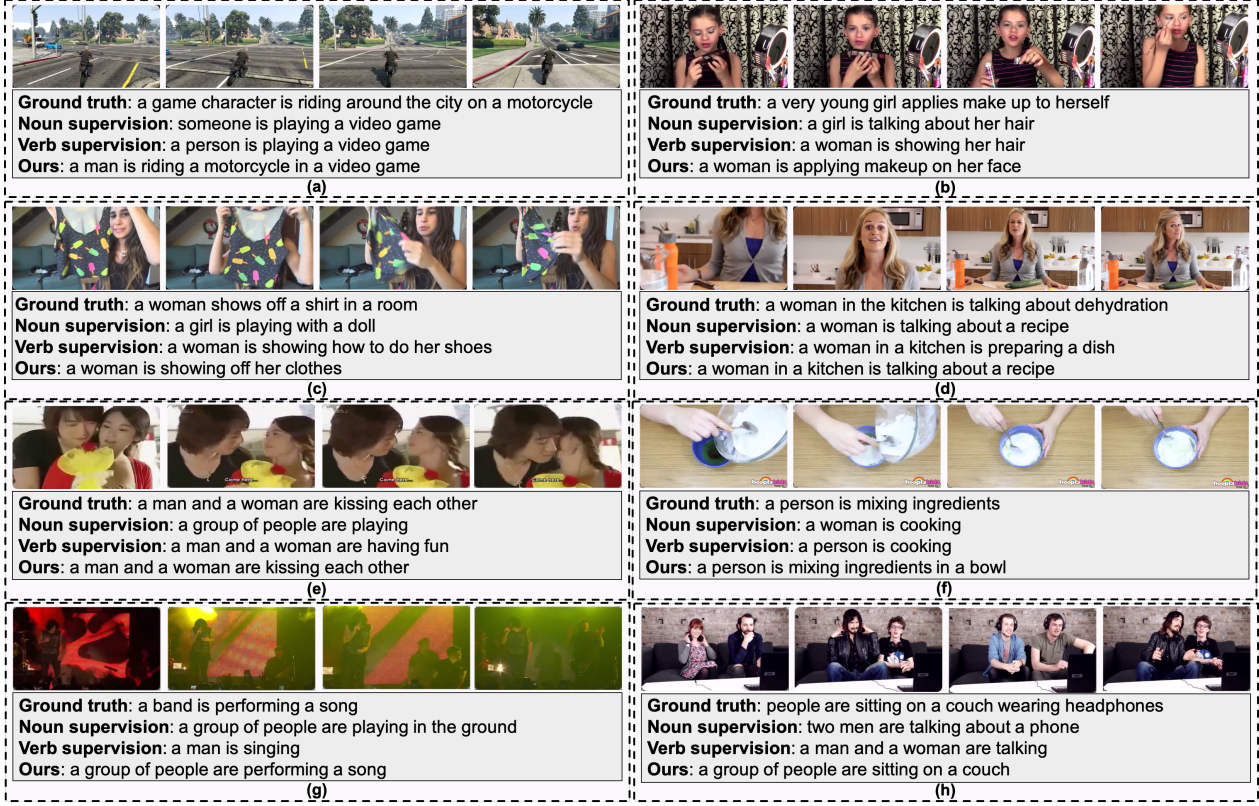

Figure 2. Examples of generated captions using two variants of our model. For comparison convenience, we also present the ground truth and the result of our model.

## 1. Illustration of Principal Objects

We show four MSR-VTT examples of what our entity module can learn in Figure 1. Since  $\bar{\mathcal{E}} = \{\bar{e}_i\}_{i=1}^N$  are predicted linguistic embeddings of  $N$  principal objects, we compute the cosine similarity between  $\bar{e}_i$  and each *entity* words in vocabulary. The top-5 results are presented.

In Figure 1 (a),  $\bar{e}_0$  captures the entity “woman” in the video, which serves as the *subject* in the generated caption;  $\bar{e}_1$  and  $\bar{e}_6$  capture the entity “girl” and “child”, which are discarded by other modules when generating the final caption;  $\bar{e}_3$ ,  $\bar{e}_4$  and  $\bar{e}_5$  capture the “stroller”, which serves as the *object* in the generated caption. In Figure 1 (b),  $\bar{e}_0$  captures the *subject* “woman”;  $\bar{e}_3$ ,  $\bar{e}_4$  and  $\bar{e}_5$  capture the *object* “dish” on the cutting board;  $\bar{e}_6$  captures the adverbial modifier “kitchen”. Although many other video objects, such as knives, paintings, cutting board, and gas stove, also appear in the video, our entity module does not adopt them as principal objects. This demonstrates that our proposed entity module has the ability to select those video objects which are likely to be mentioned in captions.

## 2. Examples of Using Different Supervisions

We show the captions generated by two model variants, i.e., “noun supervision” and “verb supervision”, on eight

MSR-VTT videos in Figure 2, where the “noun supervision” replaces the *entity* with broader *nouns* to supervise our entity module, and the “verb supervision” replaces the *predicate* with *verb* to supervise our predicate module. We also present the generated captions of our model for comparison.

We observe that the captions generated by our model contain richer and more accurate content than the two variants. For instance, in Figure 2 (a), “noun supervision” misses the “motorcycle”, and “verb supervision” generates *predicate* “playing video game” rather than more accurate “riding motorcycle”. Similarly, in Figure 2 (b), “noun supervision” focuses on the girl’s hair rather than her face. “verb supervision” incorrectly generates “showing her hair”, without realizing that the action is “applying makeup”. Our model outperforms “noun supervision” by generating more accurate *entities*. This is because *abstract nouns* in the ground truth, such as “hunger” and “satisfaction”, have no corresponding video objects, and thus introduce noise for generating captions. Meanwhile, our model can predict more accurate video actions than “verb supervision” because using the *predicate* as supervision can keep the agreement between *verbs* and *verbs’* recipients.
